# Supplementary material for: Activation and electrochemical reduction of carbon dioxide by transition metal atom-doped copper clusters
Source: Royal Society of Chemistry journal article supplement (doi:10.1039/d4nr03795b), 2025-01-01
Supplement: d4nr03795b1.pdf [file d4nr03795b1.pdf]

## Supplementary Information (SI)

### Activation and Electrochemical Reduction of Carbon Dioxide by Transition Metal Atom-Doped Copper Clusters

Manish Kumar Mohanta and Puru Jena\*

Department of Physics, Virginia Commonwealth University, Richmond, Virginia 23284,  
USA

\*E-mail: [pjena@vcu.edu](mailto:pjena@vcu.edu)

#### Computational Details:

The DFT calculation for the slab model and CO<sub>2</sub>RR are performed using the VASP code.<sup>1,2</sup> The projector-augmented wave (PAW) method is used to describe ion-electron interaction.<sup>3</sup> The generalized gradient approximation (GGA) due to Perdew-Burke-Ernzerhof (PBE) is used to treat the exchange-correlation interaction of electrons.<sup>4</sup> The cut-off energy is set to 500 eV. The convergence criteria for energy and force are set to 10<sup>-6</sup> eV and 0.01 eV/Å, respectively. A vacuum space larger than 20 Å is used to avoid the interaction between adjacent layers. A 4-atomic thick layer of Cu (111) surface having 64 atoms is used to study the interaction between Cu-flat surface and CO<sub>2</sub>. The bottom two layers of Cu (111) surface are fixed during structure relaxation and a fine k-mesh of 2×2×1 is used. The van der Waals (vdW) correction is treated using Grimme's DFT-D3 method.<sup>5</sup> For CO<sub>2</sub> reduction a vacuum of 15 Å is used along all the directions for clusters. All clusters are relaxed using the criteria mentioned before.

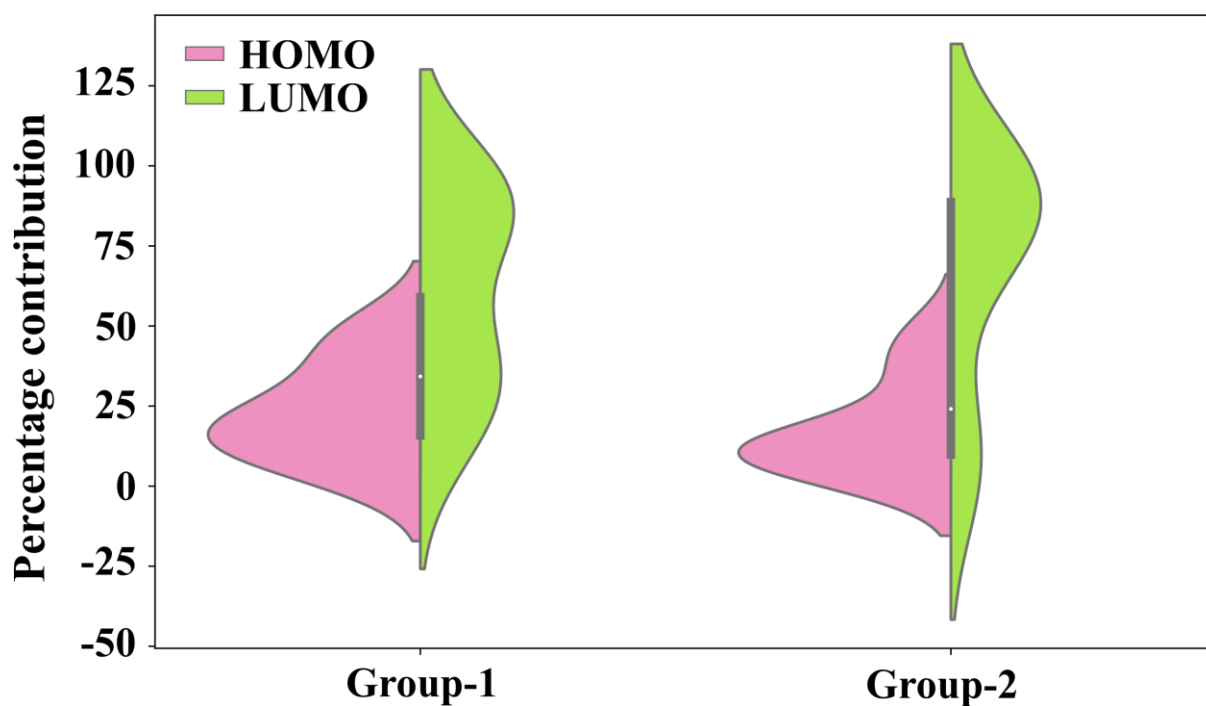

Figure S1 Percentage contribution of transition metal (X) atoms to HOMO and LUMO. Group-1 and 2 represent 3d and 4d metal atom doping.

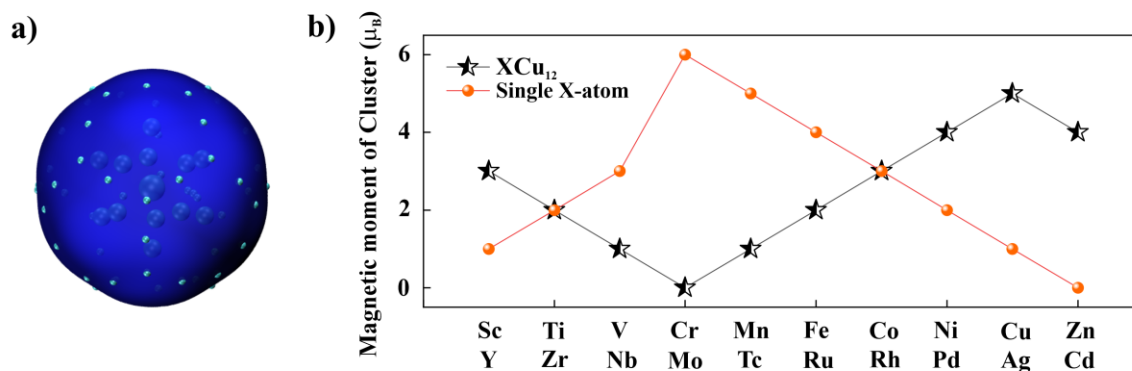

Figure S2 (a) Molecular surface map of average local ionization energy ( $\bar{I}$ ); blue colour highlights the regions having relatively low  $\bar{I}$  value indicating favourable sites for an electrophilic attack, (b) magnetic moment of XCu<sub>12</sub> clusters (black curve) and isolated single TM of both 3d and 4d elements (orange curve).

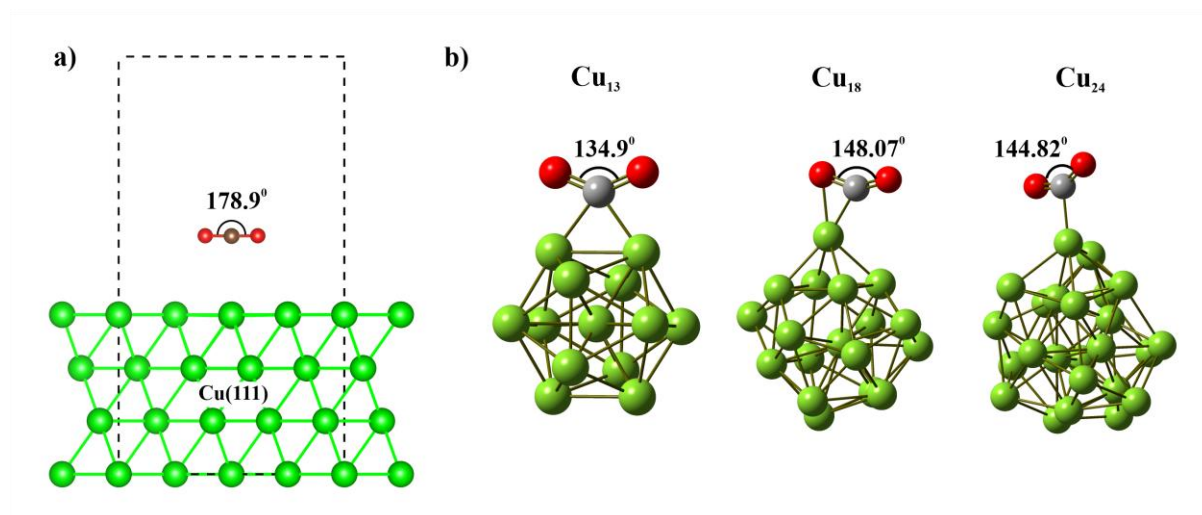

Figure S3 Interaction of CO<sub>2</sub> (a) with the Cu (111) surface where the four atomic layers are configured with the bottom two layers fixed at their bulk positions and the top two layers relaxed; (b) with various pure copper clusters.

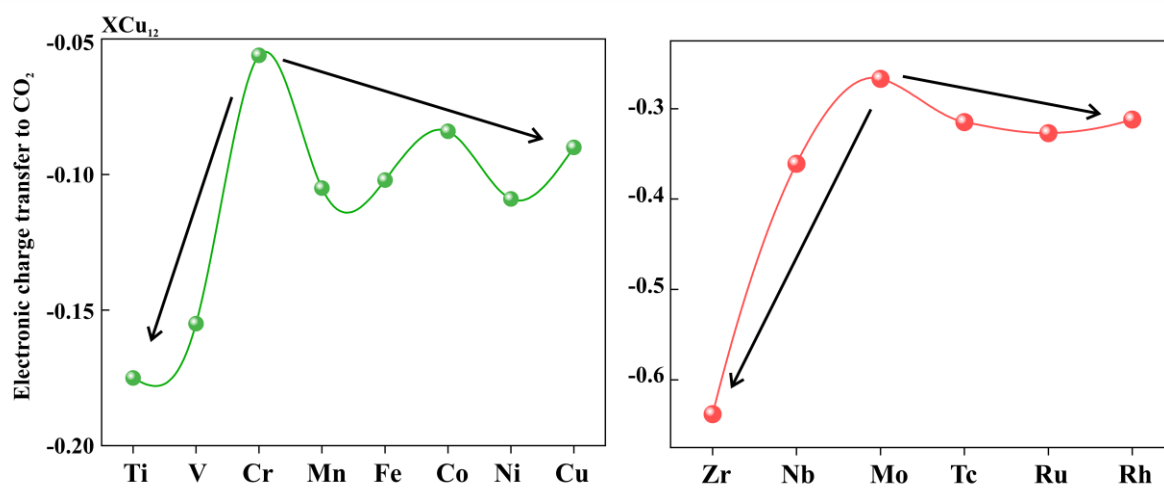

Figure S4 Electronic charge transfer to CO<sub>2</sub> molecule

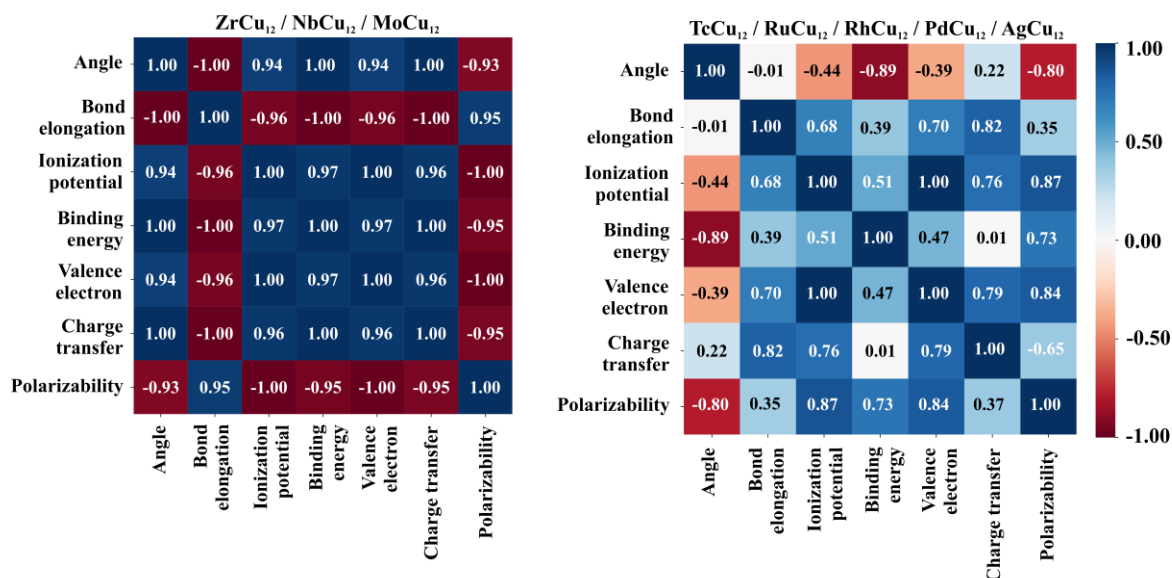

Figure S5 Pearson correlation plot; angle refers to O=C=O bond angle, bond length refers to the percentage change in C-O bond length.

| <b>Table S1 Energy of clusters with different spin states</b> |                                     |                      |                      |
|---------------------------------------------------------------|-------------------------------------|----------------------|----------------------|
| System                                                        | Energy (Hartree)/ Spin multiplicity |                      |                      |
|                                                               | 1                                   | 3                    | 5                    |
| CrCu12                                                        | <b>-20731.698548</b>                | -20731.657193        | -20731.619296        |
| MoCu12                                                        | <b>-19755.336672</b>                | -19755.204089        | -19755.172644        |
| TiCu12                                                        | -20536.498724                       | <b>-20536.503518</b> | -20536.439712        |
| ZrCu12                                                        | -19734.105941                       | <b>-19734.111514</b> | -19734.036121        |
| NiCu12                                                        | -21195.343461                       | -21195.350669        | <b>-21195.363199</b> |
| PdCu12                                                        | -19814.938326                       | -19814.945291        | <b>-19814.958796</b> |
| FeCu12                                                        | -20950.706185                       | <b>-20950.731620</b> | -20950.697409        |
| RuCu12                                                        | -19781.991393                       | <b>-19782.001452</b> | -19781.885233        |
| CdCu12                                                        | -19854.688203                       | -19854.694261        | <b>-19854.705657</b> |
| ZnCu12                                                        | -21466.356516                       | -21466.363294        | <b>-21466.373045</b> |
|                                                               |                                     |                      |                      |
| System                                                        | Energy (Hartree)/ Spin Multiplicity |                      |                      |
|                                                               | 2                                   | 4                    | 6                    |
| ScCu12                                                        | -20447.702806                       | <b>-20447.706278</b> | -20447.639760        |
| YCu12                                                         | -19725.235274                       | <b>-19725.239097</b> | -19725.158204        |
| CoCu12                                                        | -21069.796764                       | <b>-21069.806252</b> | -21069.771549        |
| RhCu12                                                        | -19797.644754                       | <b>-19797.649937</b> | -19797.543621        |
| VCu12                                                         | <b>-20631.001801</b>                | -20630.996782        | -20630.939323        |
| NbCu12                                                        | <b>-19744.096987</b>                | -19744.022322        | -19743.923174        |
| MnCu12                                                        | <b>-20838.030001</b>                | -20837.991075        | -20837.954697        |
| TcCu12                                                        | <b>-19767.919575</b>                | -19767.841454        | -19767.768779        |
| Cu13                                                          | -21327.529145                       | -21327.532575        | <b>-21327.541370</b> |
| AgCu12                                                        | -19833.954048                       | -19833.972613        | <b>-19833.981938</b> |

**Table S2 List of different parameters used for Pearson correlation plot.**

| Name (XCu <sub>12</sub> ) | Bending angle of O=C=O (degree) | % Increase in bond length | Ionization potential (eV) | Binding energy of CO <sub>2</sub> (eV) | Valence electron | Charge transfer to CO <sub>2</sub> (e) | Polarizability (a. u) |
|---------------------------|---------------------------------|---------------------------|---------------------------|----------------------------------------|------------------|----------------------------------------|-----------------------|
| Sc                        | 125.26                          | 21.44                     | 6.4                       | 3.1                                    | 15               | -0.198                                 | 301.78                |
| Ti                        | 126.49                          | 20.05                     | 6.42                      | 2.94                                   | 16               | -0.175                                 | 293.1                 |
| V                         | 128.77                          | 16.92                     | 6.57                      | 2.08                                   | 17               | -0.155                                 | 291.59                |
| Cr                        | 136.63                          | 7.41                      | 7.45                      | 1.37                                   | 18               | -0.056                                 | 298.428               |
| Mn                        | 135.42                          | 8.08                      | 5.24                      | 1.89                                   | 19               | -0.105                                 | 297.925               |
| Fe                        | 135.04                          | 8.44                      | 5.38                      | 1.9                                    | 20               | -0.102                                 | 305.66                |
| Co                        | 135.74                          | 8.06                      | 5.57                      | 1.8                                    | 21               | -0.084                                 | 313.92                |
| Ni                        | 134.78                          | 8.65                      | 5.75                      | 2.22                                   | 22               | -0.109                                 | 321.35                |
| Cu                        | 134.91                          | 8.736                     | 6.1                       | 2.185                                  | 23               | -0.09                                  | 322.765               |
| Zn                        | 122.68                          | 25.037                    | 5.84                      | 3.947                                  | 24               | -0.255                                 | 329.481               |
| Zr                        | 115.22                          | 25.82                     | 6.52                      | 3.58                                   | 16               | -0.638                                 | 308.937               |
| Nb                        | 127.87                          | 14.67                     | 6.59                      | 1.81                                   | 17               | -0.361                                 | 298.90                |
| Mo                        | 130.82                          | 11.21                     | 6.66                      | 1.17                                   | 18               | -0.267                                 | 287.494               |
| Tc                        | 126.45                          | 11                        | 4.34                      | 2.79                                   | 19               | -0.315                                 | 325.746               |
| Ru                        | 119.17                          | 13.3                      | 4.83                      | 4.32                                   | 20               | -0.327                                 | 341.868               |
| Rh                        | 120.19                          | 13.06                     | 5.22                      | 4.03                                   | 21               | -0.312                                 | 348.908               |
| Pd                        | 120.47                          | 11.14                     | 5.6                       | 3.62                                   | 22               | -0.31                                  | 350.948               |
| Ag                        | 122.26                          | 25.93                     | 5.97                      | 4.02                                   | 23               | -0.289                                 | 348.609               |

**Table S3 Binding energy of H<sub>2</sub>O on clusters (H-O-H bond angle: 103.97 degree; H-O bond length: 0.968 Å)**

|                    | Binding Energy (eV) | H-O bond length (Å) | $\angle H - O - H$ (degree) |
|--------------------|---------------------|---------------------|-----------------------------|
| CrCu <sub>12</sub> | 0.59                | 0.974               | 106.19                      |
| MnCu <sub>12</sub> | 0.42                | 0.974               | 106.2                       |
| FeCu <sub>12</sub> | 0.68                | 0.977               | 105.48                      |
| CoCu <sub>12</sub> | 0.70                | 0.974               | 106.46                      |
| NiCu <sub>12</sub> | 0.69                | 0.974               | 106.45                      |
| Cu <sub>13</sub>   | 0.57                | 0.975               | 106.54                      |

**Table S4 The number of d electrons ( $N_{TM}$ ), atomic radius ( $r_{TM}$ ) and periodic number ( $n$ ) of transition metals and their corresponding descriptor ( $\Phi$ )<sup>6</sup>**

|    | $N_{TM}$ | $r_{TM}/\text{\AA}$ | $n$ | $\Phi$ |
|----|----------|---------------------|-----|--------|
| Cr | 5        | 1.66                | 3   | 1.00   |
| Mn | 5        | 1.61                | 3   | 1.04   |
| Fe | 6        | 1.56                | 3   | 1.28   |
| Co | 7        | 1.52                | 3   | 1.54   |
| Ni | 8        | 1.49                | 3   | 1.79   |
| Cu | 10       | 1.45                | 3   | 2.3    |

**Table S5 Magnetic moment and Mulliken spin population analysis of TM-doped clusters**

| Cluster            | Magnetic moment of cluster ( $\mu_B$ ) | Mulliken spin population analysis    |                                         |
|--------------------|----------------------------------------|--------------------------------------|-----------------------------------------|
|                    |                                        | Spin population (a.u.) on central TM | Avg. spin population (a.u.) on outer Cu |
| CrCu <sub>12</sub> | 0                                      | /                                    | /                                       |
| MnCu <sub>12</sub> | 1                                      | 2.57                                 | -0.13                                   |
| FeCu <sub>12</sub> | 2                                      | 2.041                                | -0.003                                  |
| CoCu <sub>12</sub> | 3                                      | 1.051                                | 0.16                                    |
| NiCu <sub>12</sub> | 4                                      | 0.496                                | 0.29                                    |
| Cu <sub>13</sub>   | 5                                      | 0.442                                | 0.38                                    |

## References:

- 1 G. Kresse and J. Furthmüller, *Phys. Rev. B*, 1996, **54**, 11169–11186.
- 2 G. Kresse and J. Furthmüller, *Comput. Mater. Sci.*, 1996, **6**, 15–50.
- 3 P. E. Blöchl, *Phys. Rev. B*, 1994, **50**, 17953–17979.
- 4 J. P. Perdew, K. Burke and M. Ernzerhof, *Phys. Rev. Lett.*, 1996, **77**, 3865–3868.
- 5 S. Grimme, *J. Comput. Chem.*, 2006, **27**, 1787–1799.
- 6 E. Clementi, D. L. Raimondi and W. P. Reinhardt, *J. Chem. Phys.*, 1967, **47**, 1300–1307.
